# Supplementary material for: Positron emission tomography and functional characterization of a complete PBR/TSPO knockout
Source: PubMed Central journal article supplement (PMC4263137; doi:10.1038/ncomms6452), 2014-11-19
Supplement: ncomms6452-s1.pdf [file ncomms6452-s1.pdf]

# Supplementary Information:

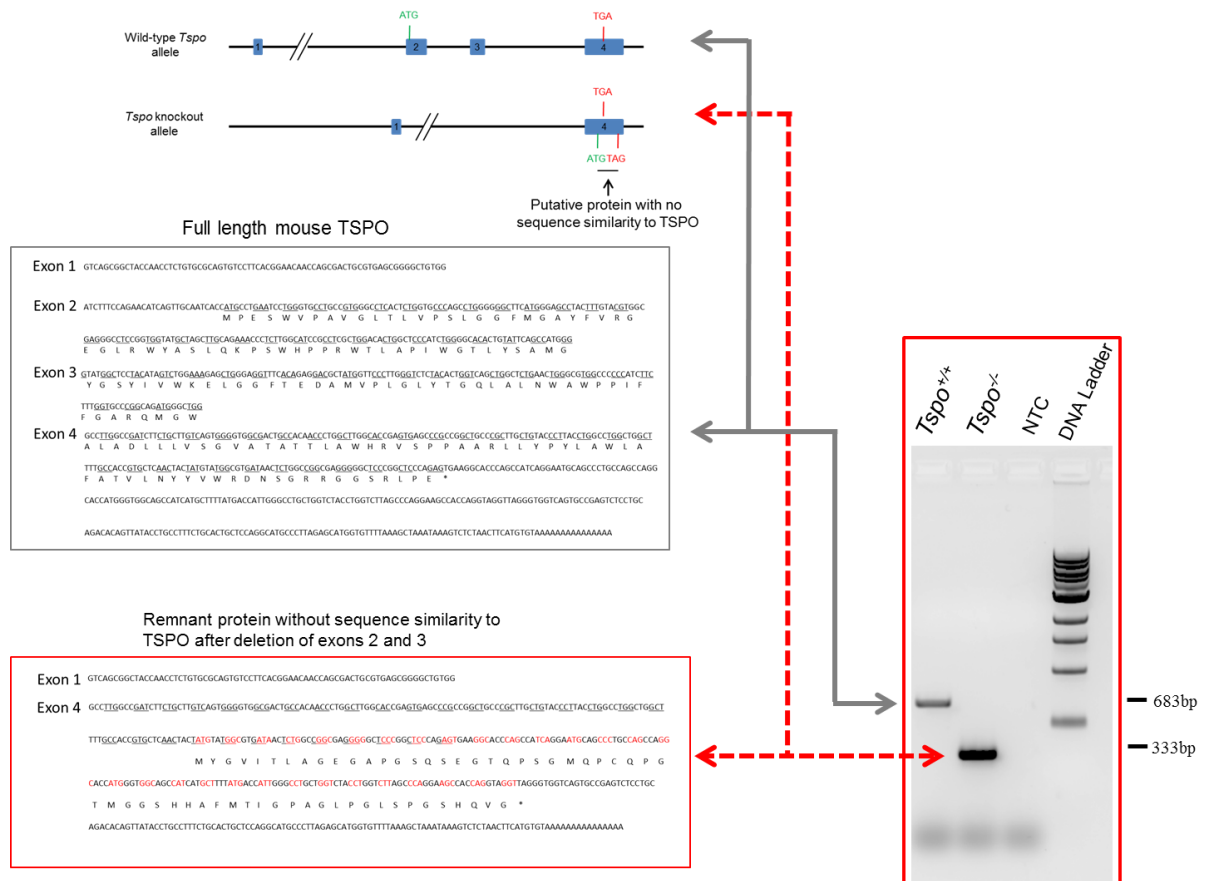

**Supplementary Figure 1. Confirmation of the deletion of exons 2 and 3.**

By deleting exons 2 and 3, only exons 1 and 4 remain. As can be observed in the above sequence of the full length *Tspo* gene, there are no start codons within the *Tspo* reading frame present in either exon 1 or exon 4. Therefore, following the deletion of exons 2 and 3, only a short protein that shares no sequence similarity to the TSPO, as shown above, could in theory be produced. The presence of a mRNA sequence corresponding to exons 1 and 4 in *Tspo* knockout mice was confirmed by RT-PCR. The cDNA from a *Tspo* knockout animal produced a product of the expected size (333 bp; red dotted line), whilst the cDNA from a wildtype animal produced a product of 683 bp which corresponds to exons 1, 2, 3 and 4. The products from both wildtype and *Tspo* knockout animals were confirmed by DNA sequencing.

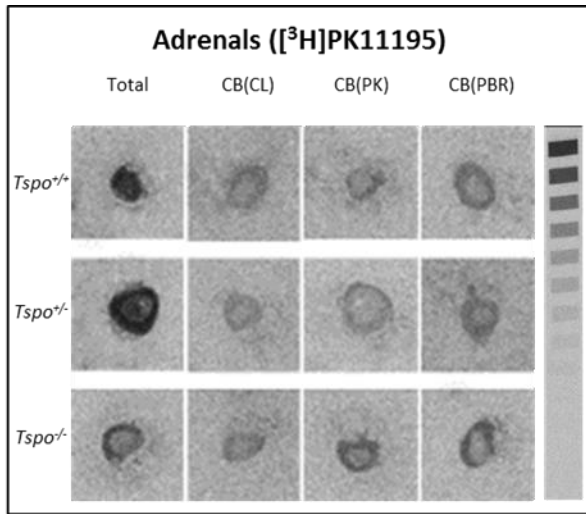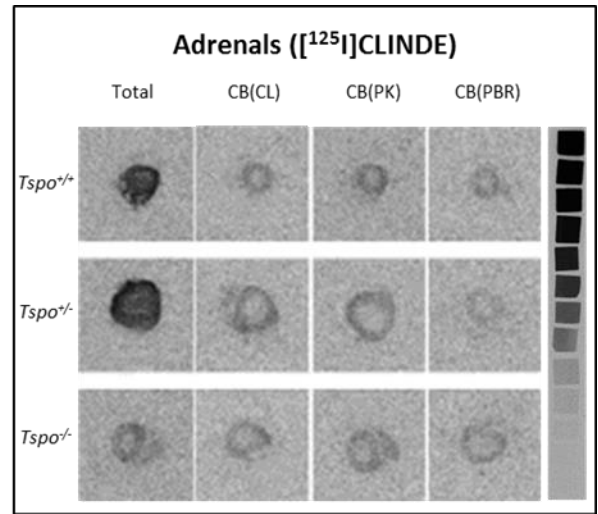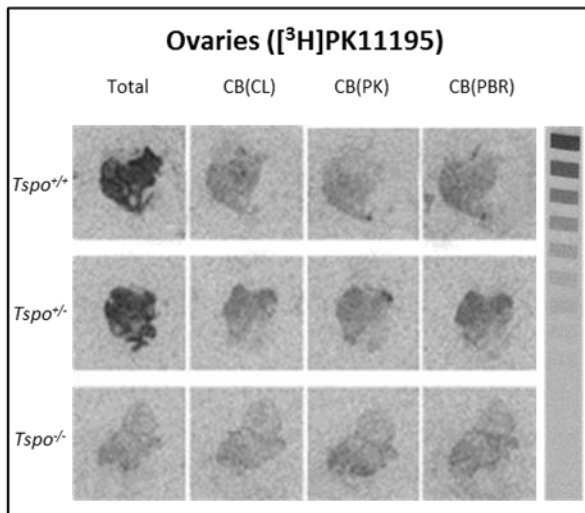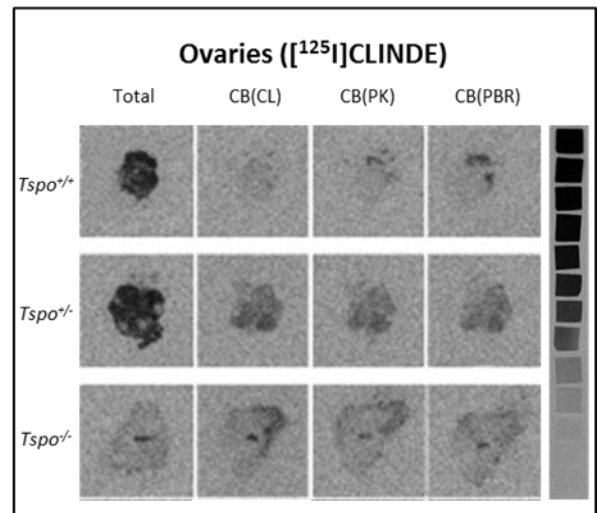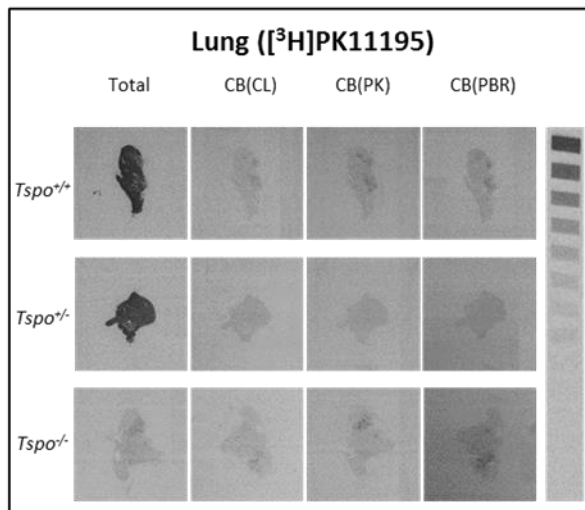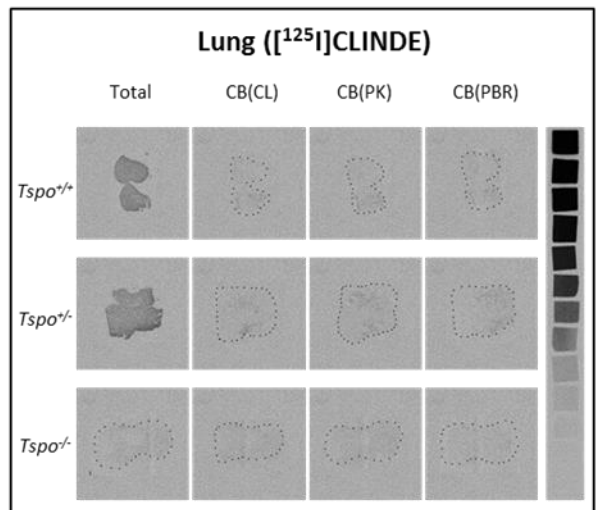

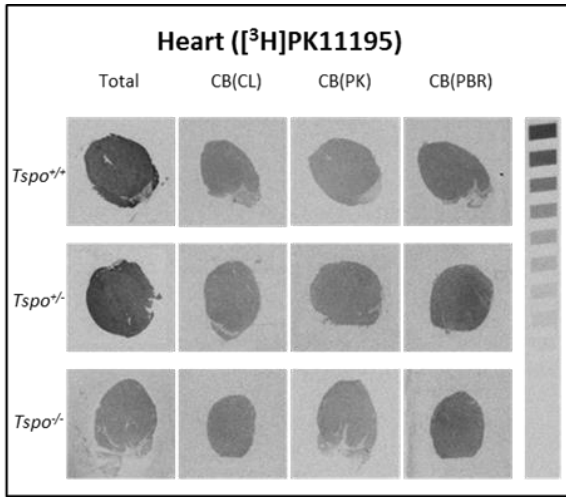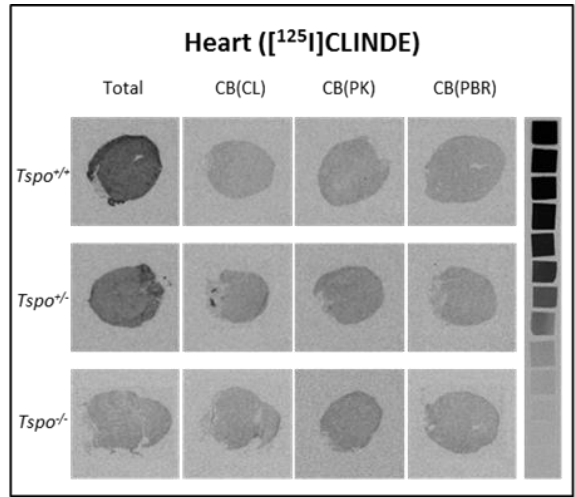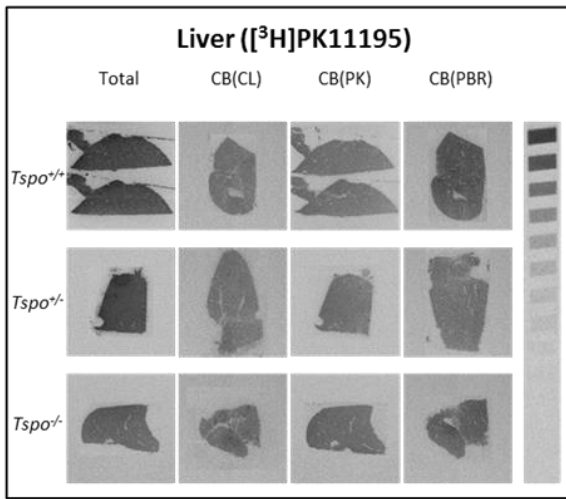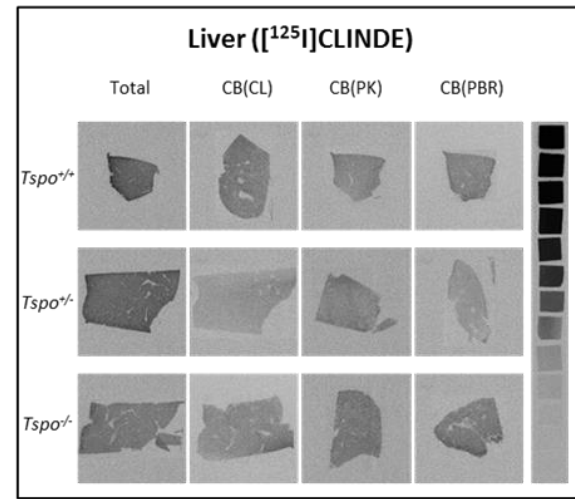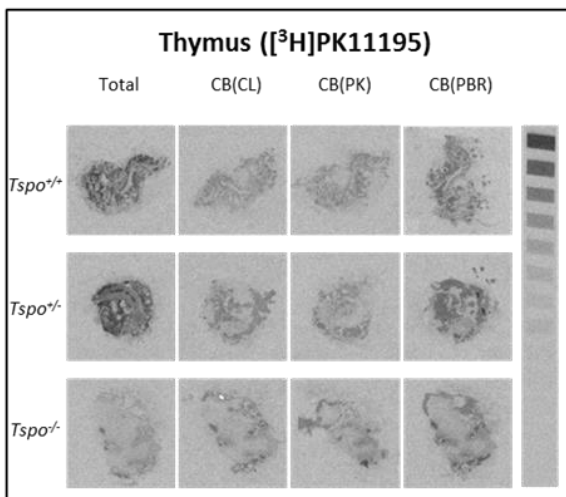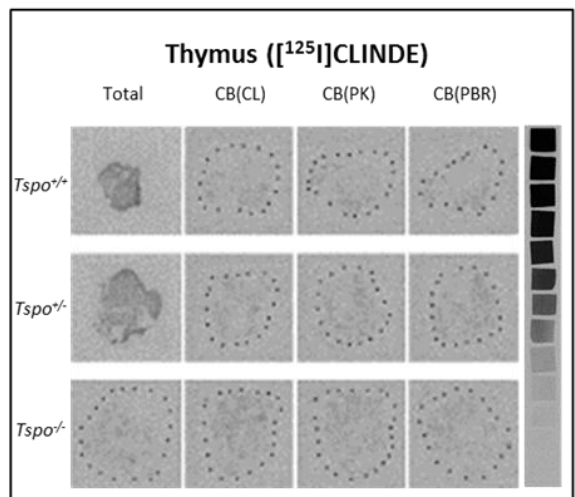

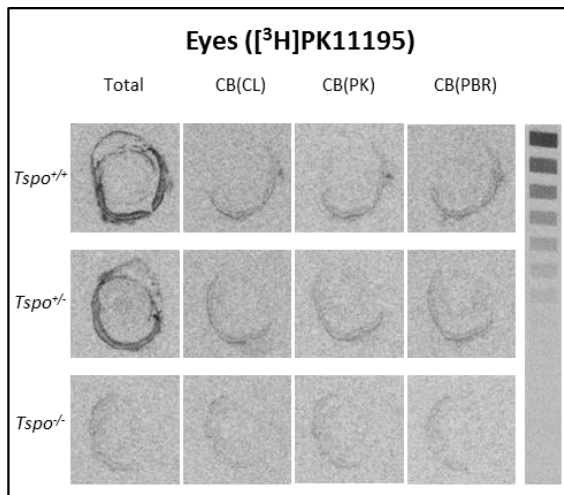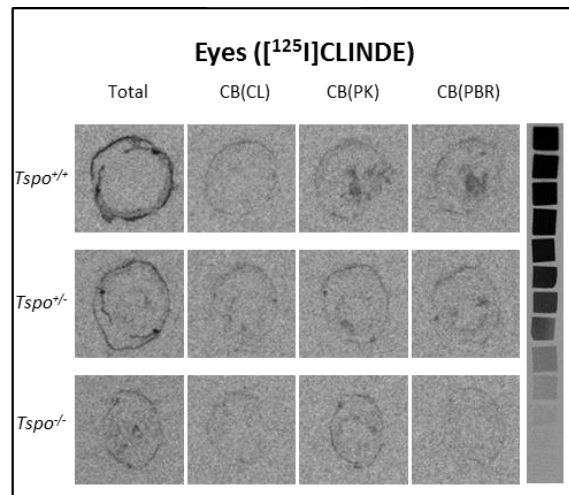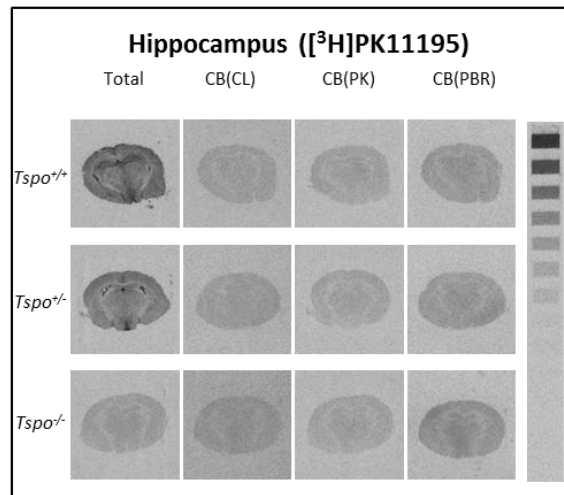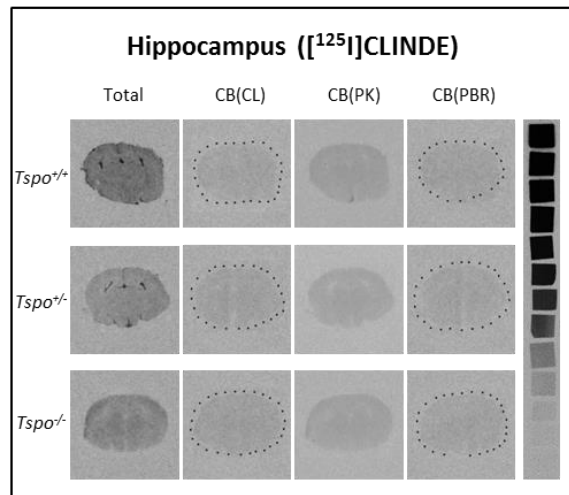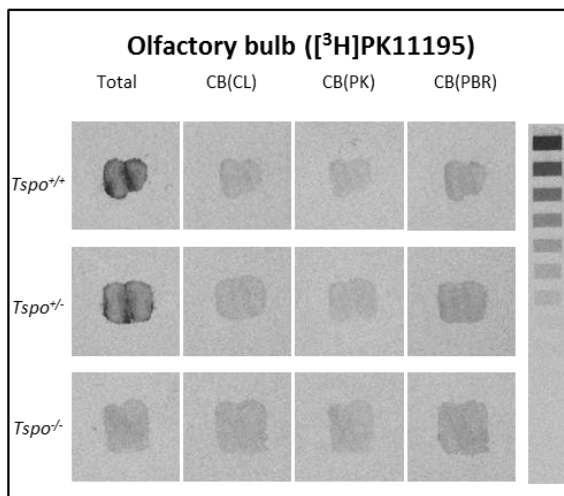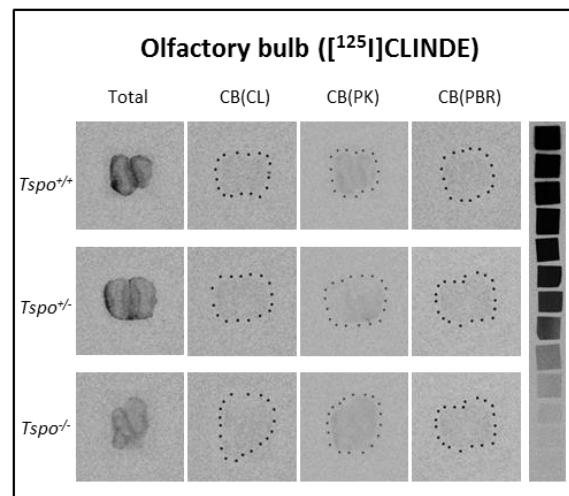

**Supplementary Figure 2. Comparative [<sup>3</sup>H]PK11195 and [<sup>125</sup>I]CLINDE autoradiography of 9 organs in adult mice.**

The receptor autoradiographs (16 μm sections) show the total binding of [<sup>3</sup>H]PK11195 (1 nM) and [<sup>125</sup>I]CLINDE (3 nM) as well as competitive displacement with 10 μM unlabelled CLINDE (CB(CL)), PK11195 (CB(PK)) and PBR111 (CB(PBR)) of adrenal glands, ovaries, lungs, heart, liver, thymus, eyes, hippocampus and olfactory bulb of *Tspo*<sup>+/+</sup>, *Tspo*<sup>+/-</sup> and *Tspo*<sup>-/-</sup> mice .

Specific binding of 3 nM [<sup>125</sup>I]CLINDE and 1 nM [<sup>3</sup>H]PK11195 is clearly visible in tissue sections from *Tspo*<sup>+/+</sup> and *Tspo*<sup>+/-</sup> mice and is displaceable by all 3 unlabelled ligands, whereas there is no specific binding in *Tspo*<sup>-/-</sup> tissue.

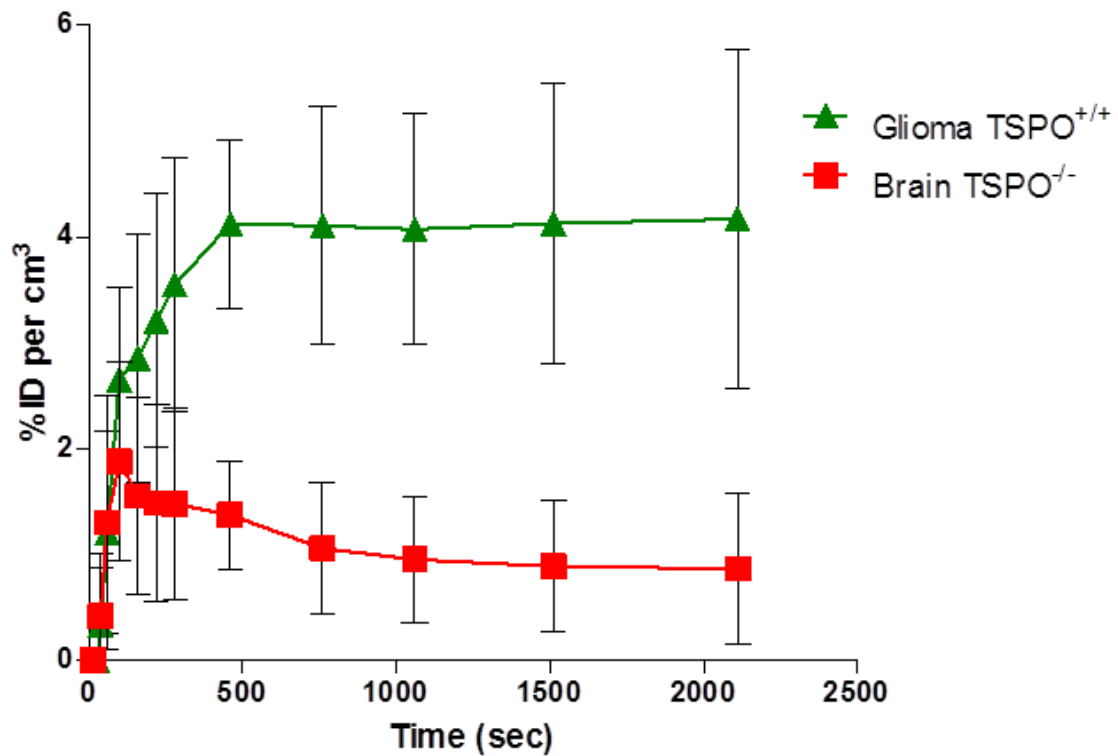

**Supplementary Figure 3. Quantification of [ $^{18}F$ ]PBR111 positron emission tomography of PBR/TSPO-expressing glioma in global TSPO knockout mouse brain.**

Time-activity curves of [ $^{18}F$ ]PBR111 25 days after GL261 glioblastoma cell implantation. (green =  $Tspo^{+/+}$  glioma; red =  $Tspo^{-/-}$  brain). Error bars denote standard deviation (n=4 for each group).

**Supplementary Table 1. Diet Composition**

| <b>Calculated Nutritional Parameters</b> | <b>Premium bredder diet - Gordon's Specialty Stockfeeds</b> | <b>Calculated Total Vitamins</b>         | <b>Premium bredder diet - Gordon's Specialty Stockfeeds</b> |
|------------------------------------------|-------------------------------------------------------------|------------------------------------------|-------------------------------------------------------------|
| Protein                                  | 23%                                                         | Vitamin A (Retinol)                      | 5666 IU/kg                                                  |
| Total Fat                                | 6%                                                          | Vitamin D (Cholecalciferol)              | 200 IU/kg                                                   |
| Crude Fibre                              | 5%                                                          | Vitamin E (a Tocopherol acetate)         | 50 mg/kg                                                    |
| Metabolizable energy                     | 13 MJ/ kg                                                   | Vitamin K (Menadione)                    | 5 mg/kg                                                     |
| <b>Calculated Amino Acids</b>            |                                                             | Vitamin C (Ascorbic acid)                | 150 mg/kg                                                   |
| Arginine                                 | 1.21%                                                       | Vitamin B1 (Thiamine)                    | 4 mg/kg                                                     |
| Valine                                   | 1.02%                                                       | Vitamin B2 (Riboflavin)                  | 5 mg/kg                                                     |
| Leucine                                  | 1.52%                                                       | Niacin (Nicotinic acid)                  | 10 mg/kg                                                    |
| Isoleucine                               | 0.80%                                                       | Vitamin B6 (Pryridoxine)                 | 6 mg/kg                                                     |
| Threonine                                | 0.84%                                                       | Pantothenic Acid                         | 12 mg/kg                                                    |
| Methionine                               | 0.59%                                                       | Biotin                                   | 0.06 mg/kg                                                  |
| Cystine                                  |                                                             | Folic Acid                               | 10 mg/kg                                                    |
| Lysine                                   | 0.98%                                                       | Vitamin B12 (Cyancobalamin)              | 5 µg/kg                                                     |
| Phenylalanine                            | 1.64%                                                       | <b>Calculated Fatty Acid Composition</b> |                                                             |
| Tyrosine                                 |                                                             | Total Mono Unsaturated Fats              | 42.90%                                                      |
| Tryptophan                               | 0.37%                                                       | Total Polyunsaturated Fats               | 30.70%                                                      |
| Histidine                                | 0.50%                                                       | Total Saturated Fats                     | 21.30%                                                      |
| <b>Calculated Total Minerals</b>         |                                                             |                                          |                                                             |
| Calcium                                  | 1.01%                                                       |                                          |                                                             |
| Phosphorous                              | 0.77%                                                       |                                          |                                                             |
| Magnesium                                | 0.18%                                                       |                                          |                                                             |
| Sodium                                   | 0.30%                                                       |                                          |                                                             |
| Potassium                                | 0.54%                                                       |                                          |                                                             |
| Iron                                     | 97.0 mg/kg                                                  |                                          |                                                             |
| Copper                                   | 10.6 mg/kg                                                  |                                          |                                                             |
| Iodine                                   | 1.15 mg/kg                                                  |                                          |                                                             |
| Manganese                                | 87.4 mg/kg                                                  |                                          |                                                             |
| Zinc                                     | 48.1 mg/kg                                                  |                                          |                                                             |
| Selenium                                 | 0.1 mg/kg                                                   |                                          |                                                             |

**Supplementary Table 2. Behaviour phenotyping**

| Test                       | index                                   | gender | TSPO <sup>+/+</sup> | TSPO <sup>+/-</sup> | TSPO <sup>-/-</sup> |
|----------------------------|-----------------------------------------|--------|---------------------|---------------------|---------------------|
| Open field                 | Time spent in center (sec)              | Male   | 160.1±101.1         | 87.70±36.35         | 112.3±43.01         |
|                            |                                         | Female | 94.33±24.28         | 124.0±45.96         | 99.94±33.94         |
|                            | Frequency of entering center            | Male   | 60.57±23.78         | 49.75±16.61         | 53.42±10.40         |
|                            |                                         | Female | 48.83±10.89         | 53.75±14.83         | 58.64±13.92         |
|                            | Time spent active (sec)                 | Male   | 711.0±50.49         | 704.0±53.59         | 738.0±26.08         |
|                            |                                         | Female | 714.3±31.12         | 676.4±42.13         | 725.7±38.34         |
|                            | Distance travelled (mm)                 | Male   | 43180±11069         | 44381±10006         | 42084±7590          |
|                            |                                         | Female | 44266±7782          | 39516±10048         | 50333±12334         |
|                            | Distanced moved without travelling (mm) | Male   | 4308±758.1          | 4185±739.5          | 4693±556.8          |
|                            |                                         | Female | 4092±584.8          | 3729±476            | 4444±603.8          |
| Emergence test             | Time spent in hidebox (sec)             | Male   | 155.4±42.56         | 129.1±35.64         | 159.8±56.15         |
|                            |                                         | Female | 121.8±41.59         | 113.1±44.85         | 121.1±43.18         |
|                            | Frequency of entering hidebox           | Male   | 30.28±15.22         | 25.55±6.629         | 26.42±9.020         |
|                            |                                         | Female | 25.17±9.411         | 23.00±10.50         | 28.55±9.903         |
|                            | Time spent active (sec)                 | Male   | 751.9±25.91         | 746.2±31.06         | 752.1±32.88         |
|                            |                                         | Female | 705.7±38.97         | 711.9±35.08         | 748.3±32.77         |
|                            | Distance travelled (mm)                 | Male   | 44545±4826          | 45864±6128          | 41474±5881          |
|                            |                                         | Female | 41125±7451          | 42068±8191          | 49188±8525          |
|                            | Distance moved without travelling (mm)  | Male   | 5765±528.4          | 5675±673.2          | 5631±784.8          |
|                            |                                         | Female | 4781±730.2          | 4753±641.5          | 5335±676.8          |
| Light/dark preference test | Time spent in light compartment (sec)   | Male   | 382.1±115.7         | 422.8±112.5         | 374.9±76.04         |
|                            |                                         | Female | 418.2±84.50         | 372.0±85.95         | 412.9±113.0         |
|                            | Transition between compartments         | Male   | 32.00±6.403         | 36.67±11.66         | 33.08±8.229         |
|                            |                                         | Female | 41.33±10.29         | 46.62±19.64         | 46.09±9.148         |
|                            | Time spent active (sec)                 | Male   | 819.4±25.79         | 821.7±15.86         | 827.5±12.60         |
|                            |                                         | Female | 803.8±20.20         | 797.0±19.08         | 810.5±17.62         |
|                            | Distance travelled (mm)                 | Male   | 50219±5948          | 52916±5955          | 50071±6780          |
|                            |                                         | Female | 53074±9692          | 48749±6220          | 58633±9674          |
|                            | Distance moved without travelling (mm)  | Male   | 8363±943.2          | 8367±790.1          | 8359±532.8          |
|                            |                                         | Female | 7682±443.0          | 7219±606.8          | 7712±735.3          |
| Elevated plus maze         | Time spent in open arms (sec)           | Male   | 134.6±59.75         | 122.9±75.71         | 145.1±59.14         |
|                            |                                         | Female | 103.8±55.92         | 139.2±78.00         | 152.46±87.09        |
|                            | Frequency of entering open arms         | Male   | 33.14±8.783         | 28.29±13.83         | 29.50±7.205         |
|                            |                                         | Female | 25.50±11.15         | 28.62±11.35         | 31.55±17.40         |
|                            | Time spent active (sec)                 | Male   | 646.9±42.39         | 619.0±63.45         | 623.3±36.55         |
|                            |                                         | Female | 607.8±74.20         | 595.6±64.95         | 624.5±62.23         |
|                            | Distance travelled (mm)                 | Male   | 21188±3554          | 18871±5954          | 19140±3803          |
|                            |                                         | Female | 17096±4673          | 17996±4994          | 20150±6317          |
|                            | Distanced moved without travelling (mm) | Male   | 5020±624.9          | 4861±632.6          | 4824±298.2          |
|                            |                                         | Female | 4737±726.9          | 4679±607.2          | 4974±550.3          |

No significant behavioural differences were found between genotypes tested with two-way ANOVA. Values represent mean ± standard deviation (n=5-10 per group).



**Supplementary Table 3. Blood phenotyping**

| analysis           | phenotype                                                   | gender | TSPO <sup>+/+</sup> | TSPO <sup>+/-</sup> | TSPO <sup>-/-</sup> |
|--------------------|-------------------------------------------------------------|--------|---------------------|---------------------|---------------------|
| Haematology        | Red blood cells (RBC)<br>(x10 <sup>6</sup> cells/ $\mu$ L)  | Male   | 9.220 $\pm$ 1.067   | 9.612 $\pm$ 1.117   | 9.560 $\pm$ 0.473   |
|                    |                                                             | Female | 9.948 $\pm$ 0.591   | 10.36 $\pm$ 0.654   | 9.795 $\pm$ 0.756   |
|                    | White blood cell (WBC)<br>(x10 <sup>3</sup> cells/ $\mu$ L) | Male   | 7.428 $\pm$ 2.195   | 8.024 $\pm$ 3.957   | 8.440 $\pm$ 1.612   |
|                    |                                                             | Female | 10.21 $\pm$ 3.572   | 8.992 $\pm$ 3.205   | 8.635 $\pm$ 2.317   |
|                    | Platelets (x10 <sup>3</sup> cells/ $\mu$ L)                 | Male   | 828.4 $\pm$ 479.6   | 1032 $\pm$ 302.8    | 1104 $\pm$ 143.4    |
|                    |                                                             | Female | 970.0 $\pm$ 184.7   | 846.0 $\pm$ 423.3   | 950.0 $\pm$ 94.84   |
|                    | Haematocrit (L/L)                                           | Male   | 0.454 $\pm$ 0.061   | 0.460 $\pm$ 0.052   | 0.464 $\pm$ 0.021   |
|                    |                                                             | Female | 0.486 $\pm$ 0.038   | 0.480 $\pm$ 0.027   | 0.472 $\pm$ 0.039   |
|                    | Reticulocytes (x10 <sup>3</sup><br>cells/ $\mu$ L)          | Male   | 332.6 $\pm$ 21.52   | 350.4 $\pm$ 26.28   | 341.6 $\pm$ 33.55   |
|                    |                                                             | Female | 377.8 $\pm$ 66.10   | 415.6 $\pm$ 83.99   | 380.8 $\pm$ 95.63   |
|                    | Haemoglobin (g/L)                                           | Male   | 102.0 $\pm$ 13.49   | 102.4 $\pm$ 9.63    | 102.4 $\pm$ 6.066   |
|                    |                                                             | Female | 109.2 $\pm$ 9.230   | 109.6 $\pm$ 6.986   | 105.5 $\pm$ 8.062   |
|                    | Mean corpuscular volume<br>(fL)                             | Male   | 98.20 $\pm$ 3.421   | 96.00 $\pm$ 2.121   | 97.20 $\pm$ 3.421   |
|                    |                                                             | Female | 97.60 $\pm$ 3.647   | 93.20 $\pm$ 1.095   | 96.00 $\pm$ 2.944   |
| Biochemistry       | Na <sup>+</sup> (mmol/L)                                    | Male   | 156.3 $\pm$ 2.645   | 157.3 $\pm$ 3.854   | 157.6 $\pm$ 1.989   |
|                    |                                                             | Female | 155.3 $\pm$ 2.490   | 153.9 $\pm$ 3.488   | 156.1 $\pm$ 1.792   |
|                    | K <sup>+</sup> (mmol/L)                                     | Male   | 8.040 $\pm$ 0.744   | 7.675 $\pm$ 0.704   | 7.620 $\pm$ 0.349   |
|                    |                                                             | Female | 7.060 $\pm$ 0.770   | 6.850 $\pm$ 0.645   | 7.160 $\pm$ 0.550   |
|                    | Cl <sup>-</sup> (mmol/L)                                    | Male   | 112.6 $\pm$ 0.894   | 112.0 $\pm$ 0.816   | 111.0 $\pm$ 1.871   |
|                    |                                                             | Female | 111.2 $\pm$ 0.837   | 112.0 $\pm$ 2.160   | 113.4 $\pm$ 2.881   |
|                    | Glucose (mmol/L)                                            | Male   | 9.550 $\pm$ 1.759   | 10.11 $\pm$ 1.417   | 10.13 $\pm$ 1.534   |
|                    |                                                             | Female | 10.06 $\pm$ 1.431   | 11.01 $\pm$ 2.393   | 11.55 $\pm$ 1.611   |
|                    | Cholesterol (mmol/L)                                        | Male   | 2.404 $\pm$ 0.706   | 2.707 $\pm$ 0.701   | 2.894 $\pm$ 0.458   |
|                    |                                                             | Female | 2.512 $\pm$ 0.622   | 2.967 $\pm$ 0.085   | 2.324 $\pm$ 0.671   |
|                    | Triglyceride (mmol/L)                                       | Male   | 1.000 $\pm$ 0.000   | 1.500 $\pm$ 0.577   | 1.600 $\pm$ 0.548   |
|                    |                                                             | Female | 1.200 $\pm$ 0.447   | 1.250 $\pm$ 0.500   | 1.138 $\pm$ 0.500   |
|                    | High density lipoprotein<br>(mmol/L)                        | Male   | 1.800 $\pm$ 0.837   | 1.750 $\pm$ 0.500   | 2.000 $\pm$ 0.000   |
|                    |                                                             | Female | 1.800 $\pm$ 0.447   | 2.000 $\pm$ 0.000   | 1.632 $\pm$ 0.507   |
|                    | Creatine kinase (U/L)                                       | Male   | 1507 $\pm$ 1254     | 2031 $\pm$ 1339     | 1067 $\pm$ 766.8    |
|                    |                                                             | Female | 1452 $\pm$ 1047     | 3576 $\pm$ 156.3    | 6417 $\pm$ 10647    |
|                    | Alanine aminotransferase<br>(U/L)                           | Male   | 29.14 $\pm$ 9.492   | 52.98 $\pm$ 38.63   | 43.62 $\pm$ 6.454   |
|                    |                                                             | Female | 36.22 $\pm$ 12.78   | 56.58 $\pm$ 13.78   | 81.98 $\pm$ 81.76   |
|                    | Bilirubin (mmol/ $\mu$ L)                                   | Male   | 4.100 $\pm$ 1.173   | 3.050 $\pm$ 0.819   | 4.200 $\pm$ 2.893   |
|                    |                                                             | Female | 3.180 $\pm$ 0.630   | 3.875 $\pm$ 0.640   | 4.100 $\pm$ 1.183   |
| Lymphocyte<br>FACs | Lymphocytes (%)                                             | Male   | 52.86 $\pm$ 4.794   | 51.80 $\pm$ 4.770   | 48.66 $\pm$ 6.494   |
|                    |                                                             | Female | 54.86 $\pm$ 6.138   | 49.38 $\pm$ 5.053   | 49.96 $\pm$ 8.400   |
|                    | T-cells (%)                                                 | Male   | 22.56 $\pm$ 5.854   | 19.90 $\pm$ 2.554   | 18.94 $\pm$ 2.214   |
|                    |                                                             | Female | 21.12 $\pm$ 4.395   | 18.66 $\pm$ 4.873   | 20.46 $\pm$ 5.793   |
|                    | CD4 <sup>+</sup> T-cells (%)                                | Male   | 41.32 $\pm$ 5.295   | 40.56 $\pm$ 3.930   | 40.00 $\pm$ 3.845   |
|                    |                                                             | Female | 38.34 $\pm$ 4.702   | 36.40 $\pm$ 3.449   | 39.14 $\pm$ 3.745   |
|                    | Activated CD4 <sup>+</sup> T-cells<br>(%)                   | Male   | 49.02 $\pm$ 9.648   | 47.14 $\pm$ 3.702   | 51.16 $\pm$ 3.233   |
|                    |                                                             | Female | 48.30 $\pm$ 6.120   | 49.82 $\pm$ 6.994   | 48.90 $\pm$ 15.04   |
|                    | CD8 <sup>+</sup> T-cells (%)                                | Male   | 33.68 $\pm$ 3.328   | 33.74 $\pm$ 3.702   | 34.46 $\pm$ 2.370   |
|                    |                                                             | Female | 34.10 $\pm$ 1.612   | 32.54 $\pm$ 5.192   | 32.04 $\pm$ 4.922   |
|                    | Activated CD8 <sup>+</sup> T-cells<br>(%)                   | Male   | 36.74 $\pm$ 8.442   | 36.20 $\pm$ 7.563   | 36.16 $\pm$ 6.690   |
|                    |                                                             | Female | 29.78 $\pm$ 5.325   | 30.68 $\pm$ 9.696   | 33.92 $\pm$ 6.479   |
|                    | B-cells (%)                                                 | Male   | 56.52 $\pm$ 4.177   | 57.38 $\pm$ 3.433   | 60.56 $\pm$ 9.176   |
|                    |                                                             | Female | 60.40 $\pm$ 5.561   | 53.88 $\pm$ 6.548   | 56.28 $\pm$ 5.356   |
|                    | Mature B-cells (%)                                          | Male   | 5.980 $\pm$ 0.916   | 6.950 $\pm$ 1.022   | 6.580 $\pm$ 1.833   |
|                    |                                                             | Female | 6.548 $\pm$ 2.391   | 9.210 $\pm$ 2.962   | 7.686 $\pm$ 2.276   |
|                    | Immature B-cells (%)                                        | Male   | 88.58 $\pm$ 0.963   | 87.620 $\pm$ 1.190  | 87.00 $\pm$ 3.811   |
|                    |                                                             | Female | 86.58 $\pm$ 3.910   | 81.600 $\pm$ 6.005  | 83.88 $\pm$ 3.454   |
|                    | Double negative B-cells<br>(%)                              | Male   | 4.610 $\pm$ 0.313   | 4.692 $\pm$ 0.504   | 5.668 $\pm$ 1.996   |
|                    |                                                             | Female | 6.116 $\pm$ 1.396   | 8.316 $\pm$ 2.958   | 7.258 $\pm$ 1.092   |
|                    | Monocytes (%)                                               | Male   | 7.904 $\pm$ 0.990   | 8.080 $\pm$ 1.190   | 9.034 $\pm$ 2.280   |
|                    |                                                             | Female | 7.540 $\pm$ 1.273   | 9.420 $\pm$ 2.621   | 9.644 $\pm$ 2.240   |

|             |                                           |        |             |             |                           |
|-------------|-------------------------------------------|--------|-------------|-------------|---------------------------|
|             | IgE <sup>+</sup> cells on lymphocytes (%) | Male   | 1.216±0.906 | 2.142±1.148 | 2.064±1.583               |
|             |                                           | Female | 1.338±0.523 | 1.044±0.677 | 0.994±0.558               |
|             | NK cells                                  | Male   | 3.990±0.564 | 3.986±0.734 | 3.542±1.277               |
|             |                                           | Female | 3.580±0.724 | 4.742±1.359 | 7.102±2.662* <sup>1</sup> |
|             | Activated NK cells (%)                    | Male   | 48.20±6.119 | 45.72±6.433 | 42.38±4.464               |
|             |                                           | Female | 28.34±5.126 | 25.86±3.325 | 25.66±3.122               |
| Spleen FACs | Lymphocytes (%)                           | Male   | 58.86±5.590 | 57.40±4.094 | 62.12±5.999               |
|             |                                           | Female | 57.18±4.124 | 56.00±6.665 | 54.54±4.787               |
|             | T-cells (%)                               | Male   | 27.94±3.431 | 29.08±3.163 | 27.94±4.448               |
|             |                                           | Female | 27.80±3.050 | 27.50±6.131 | 25.06±6.135               |
|             | CD4 <sup>+</sup> T-cells (%)              | Male   | 53.50±2.540 | 53.92±3.330 | 52.70±0.704               |
|             |                                           | Female | 53.40±1.459 | 52.40±4.743 | 53.90±5.178               |
|             | Activated CD4 <sup>+</sup> T-cells (%)    | Male   | 45.06±6.408 | 35.88±5.585 | 35.78±7.917               |
|             |                                           | Female | 46.02±6.423 | 42.58±11.24 | 50.80±4.904               |
|             | CD8 <sup>+</sup> T-cells (%)              | Male   | 27.78±1.293 | 27.58±1.970 | 28.42±0.729               |
|             |                                           | Female | 26.84±0.844 | 26.72±5.969 | 24.76±4.438               |
|             | Activated CD8 <sup>+</sup> T-cells (%)    | Male   | 25.18±5.134 | 23.52±4.061 | 24.64±7.823               |
|             |                                           | Female | 22.10±3.395 | 22.64±8.740 | 27.08±8.113               |
|             | B-cells (%)                               | Male   | 58.64±2.071 | 57.96±1.783 | 60.12±3.805               |
|             |                                           | Female | 58.98±3.650 | 59.40±3.305 | 61.28±6.465               |
|             | Immature B-cells (%)                      | Male   | 82.06±1.009 | 80.58±2.974 | 80.72±1.254               |
|             |                                           | Female | 80.34±2.648 | 77.74±5.652 | 78.40±4.128               |
|             | Mature B-cells (%)                        | Male   | 8.540±0.152 | 9.940±1.922 | 10.00±1.578               |
|             |                                           | Female | 10.40±2.723 | 13.12±3.916 | 11.74±3.440               |
|             | Double negative B-cells (%)               | Male   | 8.860±0.924 | 8.860±1.106 | 8.760±1.324               |
|             |                                           | Female | 8.860±0.564 | 8.560±1.826 | 9.360±0.910               |
|             | Monocytes (%)                             | Male   | 5.080±0.460 | 4.620±0.356 | 5.140±0.577               |
|             |                                           | Female | 5.880±0.630 | 5.620±0.522 | 5.540±1.014               |
|             | IgE <sup>+</sup> cells on monocytes (%)   | Male   | 1.000±0.418 | 1.360±0.513 | 0.760±0.467               |
|             |                                           | Female | 0.480±0.455 | 0.520±0.466 | 0.620±0.130               |
|             | NK cells (%)                              | Male   | 2.460±0.546 | 3.100±1.298 | 2.100±0.235               |
|             |                                           | Female | 2.140±0.321 | 3.180±1.262 | 3.200±1.173               |
|             | Activated NK cells (%)                    | Male   | 49.44±3.679 | 45.88±4.492 | 46.02±6.464               |
|             |                                           | Female | 39.54±5.984 | 31.46±1.576 | 35.40±3.583               |

\*The relative abundance of NK cells (%) in female *Tspo*<sup>-/-</sup> mice were significantly greater than in female *Tspo*<sup>+/+</sup> and in female *Tspo*<sup>+/-</sup> mice (P<0.05; ANOVA). Values represent mean ± standard deviation (n=5 per group).

**Supplementary Table 4. PCR Primers**

| Genotyping primers |                           |                         |              |
|--------------------|---------------------------|-------------------------|--------------|
| Name               | Sequence (5'-3')          |                         |              |
| P1                 | GGTAGACTAGTGTGGGAAGATTTGA |                         |              |
| P2                 | ATGGTGATTGCAACTGATGTTC    |                         |              |
| P3                 | TAGATACTGACCCTATCTGGGATGT |                         |              |
| RT-qPCR primers    |                           |                         |              |
| Gene               | Forward primer (5'-3')    | Reverse primer (5'-3')  | Reference    |
| <i>Actb</i>        | GGACCTGACGGACTACCTCATG    | TCTTTGATGTCACGCACGATTT  | <sup>1</sup> |
| <i>P450scc</i>     | ACATGGCCAAGATGGTACAGTTG   | ACGAAGCACCAGGTCATTCAC   | <sup>2</sup> |
| <i>Gapdh</i>       | CCATGGAGAAGGCTGGGG        | CAAAGTTGTCATGGATGACC    | <sup>3</sup> |
| <i>StAR</i>        | TCTCTAGTGTCTCCCACTGCATAGC | TTAGCATCCCCTGTTCGTAGCT  | <sup>2</sup> |
| <i>Tspo</i>        | GGGAGCCTACTTTGTGCGTGG     | CAGGTAAGGATACAGCAAGCGGG | <sup>4</sup> |
| <i>Tspo2</i>       | CCAGTCGGTGTGAGGATGAG      | AGTAGAGACCAAGGGGCAGT    |              |
| RT-PCR primers     |                           |                         |              |
| Gene               | Forward primer (5'-3')    | Reverse primer (5'-3')  |              |
| <i>Tspo</i>        | AACCAGCGACTGCGTGAG        | GTGGCTTCTGGGCTAAGAC     |              |

**Supplementary References**

- 1 Morita, H. *et al.* Neonatal lethality of LGR5 null mice is associated with ankyloglossia and gastrointestinal distension. *Mol Cell Biol* **24**, 9736-9743 (2004).
- 2 Bouma, G. J., Hart, G. T., Washburn, L. L., Recknagel, A. K. & Eicher, E. M. Using real time RT-PCR analysis to determine multiple gene expression patterns during XX and XY mouse fetal gonad development. *Gene Expr Patterns* **5**, 141-149 (2004).
- 3 Dveksler, G. S., Basile, A. A. & Dieffenbach, C. W. Analysis of gene expression: use of oligonucleotide primers for glyceraldehyde-3-phosphate dehydrogenase. *PCR Methods Appl* **1**, 283-285 (1992).
- 4 Kam, W. W., Meikle, S. R., Dunstan, C. R. & Banati, R. B. The 18 kDa translocator protein (peripheral benzodiazepine receptor) expression in the bone of normal, osteoprotegerin or low calcium diet treated mice. *PloS one* **7**, e30623 (2012).
